# Supplementary material for: Rofecoxib and Cardiovascular Adverse Events in Adjuvant Treatment of Colorectal Cancer
Source: Atypon-hosted journal article supplement (doi:10.1056/nejmoa071841), 2007-07-25
Supplement: nejm_kerr_360sa1.pdf [file nejm_kerr_360sa1.pdf]

## Supplementary Appendix

This appendix has been provided by the authors to give readers additional information about their work.

Supplement to: Kerr DJ, Dunn JA, Langman MJ, et al. Rofecoxib and cardiovascular adverse events in adjuvant treatment of colorectal cancer. *N Engl J Med* 2007;357:360-9.

**Web Table 1: Cardiovascular event adjudication committee – Cardiology:**

Bernard Chaitman, St Louis University School of Medicine, St Louis, MO, USA; Leonard S Dreifus, University of South Florida/Tampa, Lake Mary, FL, USA; George Vetrovec, Medical College of VA, Richmond, VA, USA; Neurology: Harold Adams, University of Iowa Hospitals and Clinics, Iowa City, IA, USA; Jay P Mohr, Columbia University, New York, NY, USA; Justin A Zivin, University of California, San Diego School of Medicine, LaJolla, CA, USA. Peripheral vascular: Jeffrey Ginsberg, McMaster University, Hamilton, Canada; Clive Kearon, McMaster University Clinic, Hamilton, Canada; Thom Rooke, Mayo Clinic, Rochester, MN, USA.

**WEB TABLE 2: Listing of Investigator-Reported Potentially Thrombotic CV Events**

| CV Event                                                                     | TCVSAE <sup>5</sup> | APTC <sup>6</sup> | Allocation | Treatment duration before event (days) |
|------------------------------------------------------------------------------|---------------------|-------------------|------------|----------------------------------------|
| <b>Events up to 14 days after discontinuation presented for adjudication</b> |                     |                   |            |                                        |
| <sup>8</sup> Fatal acute myocardial infarction                               | Y                   | Y                 | Rofecoxib  | 531                                    |
| Acute myocardial infarction                                                  | Y                   | Y                 | Rofecoxib  | 352                                    |
| Acute myocardial infarction                                                  | Y                   | Y                 | Rofecoxib  | 331                                    |
| <sup>81</sup> Fatal acute myocardial infarction                              | Y                   | Y                 | Rofecoxib  | 420                                    |
| <sup>1</sup> Oesophageal carcinoma                                           | N                   | N                 | Rofecoxib  | 411                                    |
| <sup>7</sup> Acute myocardial infarction                                     | Y                   | Y                 | Rofecoxib  | 465                                    |
| Ischemic Cerebrovascular stroke                                              | Y                   | Y                 | Rofecoxib  | 19                                     |
| <sup>2</sup> Ischemic Cerebrovascular stroke                                 | Y                   | Y                 | Rofecoxib  | <11 <sup>4</sup>                       |
| <sup>82</sup> Fatal Acute myocardial infarction                              | Y                   | Y                 | Rofecoxib  | <15 <sup>4</sup>                       |
| <sup>7</sup> Ischemic Cerebrovascular stroke                                 | Y                   | Y                 | Rofecoxib  | 102                                    |
| <sup>8</sup> Sudden cardiac death                                            | Y                   | Y                 | Rofecoxib  | 22                                     |
| Transient ischemic attack                                                    | Y                   | N                 | Rofecoxib  | 369                                    |
| Peripheral venous thrombosis                                                 | Y                   | N                 | Rofecoxib  | 123                                    |
| <sup>7</sup> Peripheral venous thrombosis                                    | Y                   | N                 | Rofecoxib  | 386                                    |
| Pulmonary embolism                                                           | Y                   | N                 | Rofecoxib  | 64                                     |
| Unstable angina pectoris                                                     | Y                   | N                 | Rofecoxib  | 5                                      |
| <sup>7</sup> Transient ischemic attack                                       | Y                   | N                 | Rofecoxib  | 84                                     |

|                                                                                                |   |   |           |     |
|------------------------------------------------------------------------------------------------|---|---|-----------|-----|
| Myocardial ischemia                                                                            | N | N | Rofecoxib | 142 |
| <sup>7</sup> Cardiac arrest (probable lung ca)                                                 | N | N | Rofecoxib | 677 |
| Myocardial ischemia                                                                            | N | N | Rofecoxib | 555 |
| Alveolitis fibrosing                                                                           | N | N | Rofecoxib | 188 |
| Transient ischemic attack                                                                      | N | N | Rofecoxib | 47  |
| Transient ischemic attack                                                                      | N | N | Rofecoxib | 157 |
| <sup>7</sup> Acute myocardial infarction                                                       | Y | Y | Placebo   | 285 |
| <sup>783</sup> Sudden cardiac death                                                            | Y | Y | Placebo   | 592 |
| <sup>73</sup> Cardiac thrombus                                                                 | Y | N | Placebo   | 501 |
| <sup>73</sup> Cerebral ischemia                                                                | N | N | Placebo   | 524 |
| Ischemic Cerebrovascular stroke                                                                | Y | Y | Placebo   | 512 |
| <sup>8</sup> Sudden cardiac death                                                              | Y | Y | Placebo   | 173 |
| Unstable angina pectoris                                                                       | Y | N | Placebo   | 77  |
| Pulmonary embolism                                                                             | Y | N | Placebo   | 77  |
| <sup>78</sup> Fatal hemorrhagic<br>cerebrovascular stroke                                      | N | Y | Placebo   | 190 |
| Cerebral infarct                                                                               | N | Y | Placebo   | 29  |
| Loss of consciousness,<br>disorientation, vomiting, syncope                                    | N | N | Placebo   | 200 |
| <sup>7</sup> Angina pectoris                                                                   | N | N | Placebo   | 106 |
|                                                                                                |   |   |           |     |
| <b>Events after discontinuation + 14 days adjudicated by the VICTOR trial team (DK and RM)</b> |   |   |           |     |
| <sup>7</sup> Cerebrovascular accident                                                          | Y | Y | Rofecoxib | 196 |

|                                         |   |   |           |     |
|-----------------------------------------|---|---|-----------|-----|
| Cerebrovascular accident                | Y | Y | Rofecoxib | 129 |
| <sup>78</sup> Myocardial infarction     | Y | Y | Rofecoxib | 260 |
| <sup>7</sup> Myocardial infarction      | Y | Y | Rofecoxib | 198 |
| <sup>7</sup> Arterial thrombosis        | Y | N | Rofecoxib | 136 |
| <sup>7</sup> Transient ischaemic attack | Y | N | Rofecoxib | 104 |
| Cerebrovascular accident                | Y | Y | Placebo   | 213 |
| <sup>78</sup> Myocardial infarction     | Y | Y | Placebo   | 172 |
| <sup>7</sup> Myocardial infarction      | Y | Y | Placebo   | 38  |
| <sup>78</sup> Myocardial infarction     | Y | Y | Placebo   | 19  |
| <sup>78</sup> Arterial thrombosis       | Y | N | Placebo   | 253 |
| <sup>78</sup> Pulmonary embolism        | Y | N | Placebo   | 249 |
| Unstable angina                         | Y | N | Placebo   | 15  |
| <sup>78</sup> Arterial thrombosis       | Y | N | Placebo   | 40  |

<sup>1</sup> Two events 30 days apart for the same patient

<sup>2</sup> Two events 4 days apart for the same patient

<sup>3</sup> Three events for the same patient

<sup>4</sup> Treatment discontinuation date is approximate

<sup>5</sup> Thrombotic Cardiovascular Serious Adverse Event (TCVSAE)

<sup>6</sup> Antiplatelet Trialists Collaboration (APTC)

<sup>7</sup> Reported after study unblinding, 01/10/2004

<sup>8</sup> Fatal event

## WEB FIGURE 1: CARDIOVASCULAR RISK ASSESSMENT FORM

### DOCUMENTED HISTORY OF VASCULAR DISEASE

| <b>Does the patient have a history of any of the following:</b>                                | <b>No</b>                | <b>Yes</b>               |
|------------------------------------------------------------------------------------------------|--------------------------|--------------------------|
| Myocardial infarction:                                                                         | <input type="checkbox"/> | <input type="checkbox"/> |
| Angina (physician diagnosed):                                                                  | <input type="checkbox"/> | <input type="checkbox"/> |
| Coronary intervention (e.g. prior bypass surgery, coronary angioplasty or stent):              | <input type="checkbox"/> | <input type="checkbox"/> |
| Prior cardiac catheterisation showing coronary artery disease:                                 | <input type="checkbox"/> | <input type="checkbox"/> |
| Carotid artery stenosis on ultrasound or angiography:                                          | <input type="checkbox"/> | <input type="checkbox"/> |
| Cerebrovascular accident:                                                                      | <input type="checkbox"/> | <input type="checkbox"/> |
| Transient ischaemic attack:                                                                    | <input type="checkbox"/> | <input type="checkbox"/> |
| Peripheral vascular disease (e.g. history of claudication, prior peripheral vascular disease): | <input type="checkbox"/> | <input type="checkbox"/> |

### CARDIAC RISK FACTORS

| <b>Does the patient have a history of:</b>                        | <b>No</b>                | <b>Yes</b>               | <b>Unknown</b>           |
|-------------------------------------------------------------------|--------------------------|--------------------------|--------------------------|
| Diabetes mellitus:                                                | <input type="checkbox"/> | <input type="checkbox"/> | -                        |
| Hypertension:                                                     | <input type="checkbox"/> | <input type="checkbox"/> | -                        |
| Hyperlipidaemia (LDL >130 mg/dl and/or HDL <40 mg/dl):            | <input type="checkbox"/> | <input type="checkbox"/> | <input type="checkbox"/> |
| <b>Does the patient have a family history of cardiac disease:</b> | <input type="checkbox"/> | <input type="checkbox"/> | <input type="checkbox"/> |

(i.e. father or brother with a diagnosis of heart attack or angina before the age of 55 or mother or sister with a diagnosis of heart attack or angina before the age of 65?)

**Does the patient currently smoke:**   -

MEDICATIONS

**Is the patient taking any of the following for prophylaxis against myocardial infarction or other thromboembolic disease:**

|                             | No                       | Yes                      |   |
|-----------------------------|--------------------------|--------------------------|---|
| Clopidogrel:                | <input type="checkbox"/> | <input type="checkbox"/> |   |
| Ticlopidine:                | <input type="checkbox"/> | <input type="checkbox"/> |   |
| Other anti-platelet agents: | <input type="checkbox"/> | <input type="checkbox"/> | * |

\* If yes, please specify agent(s): \_\_\_\_\_

**WEB FIGURE 2: CONSORT DIAGRAM**

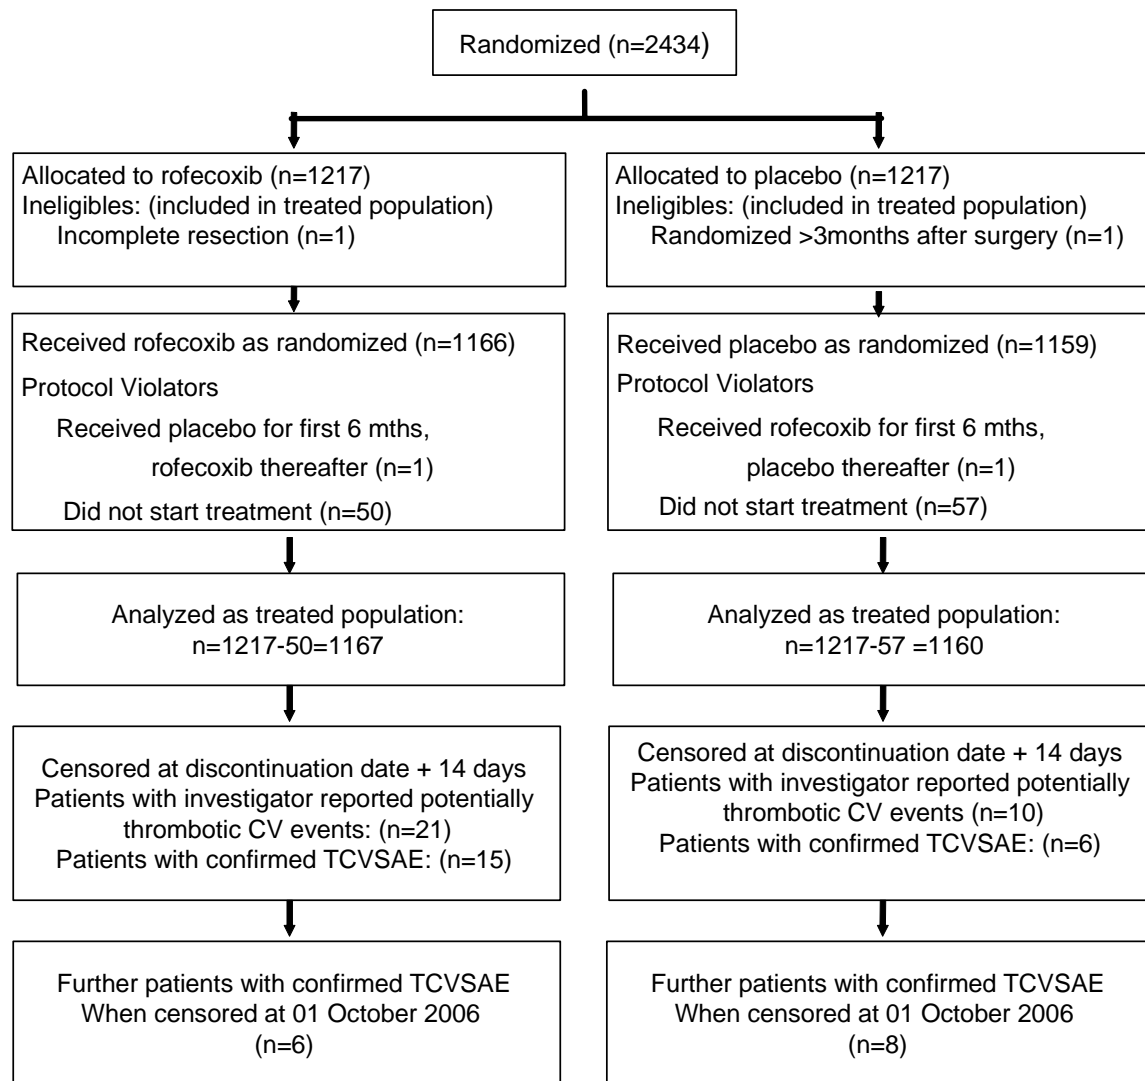

## CONSORT Checklist of items to include when reporting a randomized trial

| PAPER SECTION<br>And topic        | Item | Description                                                                                                                                                                                              | Reported<br>on<br>Page # |
|-----------------------------------|------|----------------------------------------------------------------------------------------------------------------------------------------------------------------------------------------------------------|--------------------------|
| <i>TITLE &amp;<br/>ABSTRACT</i>   | 1    | <u>How participants were allocated to interventions</u> (e.g., "random allocation", "randomized", or "randomly assigned").                                                                               | 1 & 2                    |
| <i>INTRODUCTION</i><br>Background | 2    | <u>Scientific background and explanation of rationale.</u>                                                                                                                                               | 5                        |
| <i>METHODS</i><br>Participants    | 3    | <u>Eligibility criteria for participants</u> and the <u>settings and locations where the data were collected.</u>                                                                                        | 6                        |
| Interventions                     | 4    | <u>Precise details of the interventions intended for each group and how and when they were actually administered.</u>                                                                                    | 7                        |
| Objectives                        | 5    | <u>Specific objectives and hypotheses.</u>                                                                                                                                                               | 6                        |
| Outcomes                          | 6    | <u>Clearly defined primary and secondary outcome measures</u> and, when applicable, any <u>methods used to enhance the quality of measurements</u> (e.g., multiple observations, training of assessors). | 8 & 9                    |
| Sample size                       | 7    | <u>How sample size was determined</u> and, when applicable, <u>explanation of any interim analyses and stopping rules.</u>                                                                               | 9                        |
| Randomization --                  | 8    | <u>Method used to generate the random allocation</u>                                                                                                                                                     | 7                        |

|                                         |    |                                                                                                                                                                                                                                                                                                                                                                    |                  |
|-----------------------------------------|----|--------------------------------------------------------------------------------------------------------------------------------------------------------------------------------------------------------------------------------------------------------------------------------------------------------------------------------------------------------------------|------------------|
| Sequence generation                     |    | <u>sequence, including details of any restrictions</u> (e.g., blocking, stratification)                                                                                                                                                                                                                                                                            |                  |
| Randomization -- Allocation concealment | 9  | <u>Method used to implement the random allocation sequence</u> (e.g., numbered containers or central telephone), clarifying whether the sequence was concealed until interventions were assigned.                                                                                                                                                                  | 7                |
| Randomization -- Implementation         | 10 | <u>Who generated the allocation sequence, who enrolled participants, and who assigned participants to their groups.</u>                                                                                                                                                                                                                                            | 7                |
| Blinding (masking)                      | 11 | <u>Whether or not participants, those administering the interventions, and those assessing the outcomes were blinded to group assignment.</u> When relevant, <u>how the success of blinding was evaluated.</u>                                                                                                                                                     | 7                |
| Statistical methods                     | 12 | <u>Statistical methods used to compare groups for primary outcome(s); Methods for additional analyses,</u> such as subgroup analyses and adjusted analyses.                                                                                                                                                                                                        | 9                |
| RESULTS<br>Participant flow             | 13 | <u>Flow of participants through each stage</u> (a diagram is strongly recommended). Specifically, for each group report the numbers of participants randomly assigned, receiving intended treatment, completing the study protocol, and analyzed for the primary outcome.<br><br><u>Describe protocol deviations from study as planned, together with reasons.</u> | 10, Web Figure 2 |

|                              |    |                                                                                                                                                                                                                       |             |
|------------------------------|----|-----------------------------------------------------------------------------------------------------------------------------------------------------------------------------------------------------------------------|-------------|
| Recruitment                  | 14 | <u>Dates defining the periods of recruitment and follow-up.</u>                                                                                                                                                       | 10          |
| Baseline data                | 15 | <u>Baseline demographic and clinical characteristics of each group.</u>                                                                                                                                               | 10, Table 1 |
| Numbers analyzed             | 16 | <u>Number of participants (denominator) in each group included in each analysis and whether the analysis was by "intention-to-treat".</u> State the results in absolute numbers when feasible (e.g., 10/20, not 50%). | 10          |
| Outcomes and estimation      | 17 | <u>For each primary and secondary outcome, a summary of results for each group, and the estimated effect size and its precision</u> (e.g., 95% confidence interval).                                                  | 11, 12      |
| Ancillary analyses           | 18 | <u>Address multiplicity by reporting any other analyses performed,</u> including subgroup analyses and adjusted analyses, indicating those pre-specified and those exploratory.                                       | 12          |
| Adverse events               | 19 | <u>All important adverse events or side effects in each intervention group.</u>                                                                                                                                       | 11, 12      |
| DISCUSSION<br>Interpretation | 20 | <u>Interpretation of the results,</u> taking into account study hypotheses, sources of potential bias or imprecision and the dangers associated with multiplicity of analyses and outcomes.                           | 13          |
| Generalizability             | 21 | <u>Generalizability (external validity) of the trial findings.</u>                                                                                                                                                    | 13          |

|                  |    |                                                                                  |    |
|------------------|----|----------------------------------------------------------------------------------|----|
| Overall evidence | 22 | <u>General interpretation of the results in the context of current evidence.</u> | 13 |
|------------------|----|----------------------------------------------------------------------------------|----|
